## Addendum: Sequencing of *BRCA1/2*-alterations using NGS-based technology: annotation as a challenge

Silvana Ebner<sup>1</sup>, Ria Winkelmann<sup>1</sup>, Saskia Martin<sup>1</sup>, Jens Köllermann<sup>1</sup>, Peter J. Wild<sup>1,2</sup> and Melanie Demes<sup>1,2</sup>

<sup>1</sup>Dr. Senckenberg Institute of Pathology, University Hospital Frankfurt, Frankfurt am Main, Germany

<sup>2</sup>Wildlab, University Hospital MVZ GmbH, Frankfurt am Main, Germany

**Published:** August 30, 2023

**Copyright:** © 2023 Ebner et al. This is an open access article distributed under the terms of the [Creative Commons Attribution License](#) (CC BY 3.0), which permits unrestricted use, distribution, and reproduction in any medium, provided the original author and source are credited.

**This article has an addendum:** No external funding was obtained.

Original article: Oncotarget. 2022; 13:464–475. <https://doi.org/10.18632/oncotarget.28213>
